# Supplementary material for: Risk Factors for Excess Mortality in the First Year After Curative Surgery for Colorectal Cancer
Source: Springer Nature journal article supplement (doi:10.1245/s10434-012-2294-6), 2012-03-06
Supplement: MOESM1 [file 9798846]

**Supplementary table to figure 2: Multivariable One-year Relative Survival, expressed as relative excess risk (RER) for colon and rectal cancer patients separately** Multivariable analyses includes all variables with p-value of 0.1 or smaller. Besides, gender, stage & treatment were also entered into the model.

|                      |             | EVENT = DOD AT 1 YEAR |                  |                      |                  |                       |              |                       |              |
|----------------------|-------------|-----------------------|------------------|----------------------|------------------|-----------------------|--------------|-----------------------|--------------|
|                      |             | COLON                 |                  |                      |                  | RECTAL                |              |                       |              |
|                      |             | Univariate            |                  | Multivariable        |                  | Univariate            |              | Multivariable         |              |
|                      |             | RER (95%CI)           | p-value          | RER (95%CI)          | p-value          | RER (95%CI)           | p-value      | RER (95%CI)           | p-value      |
| <b>Age</b>           | <65         | <b>1</b>              | <b>0.0001</b>    | <b>1</b>             | <b>0.004</b>     | <b>1</b>              | <b>0.01</b>  | <b>1</b>              | <b>0.009</b> |
|                      | 65-74       | <b>2.0 (1.1-3.6)</b>  |                  | <b>1.8 (1.0-3.3)</b> |                  | <b>2.8 (0.7-11.0)</b> |              | <b>1.6 (0.4-7.6)</b>  |              |
|                      | ≥75         | <b>3.2 (1.9-5.4)</b>  |                  | <b>2.6 (1.5-4.5)</b> |                  | <b>6.2 (1.7-22.0)</b> |              | <b>7.0 (1.8-27.4)</b> |              |
| <b>Sex</b>           | Male        | 1                     | 0.2              | 1                    | 0.3              | 1                     | 0.2          | 1                     | 0.1          |
|                      | Female      | 0.8 (0.5-1.1)         |                  | 0.8 (0.6-1.2)        |                  | 0.5 (0.2-1.3)         |              | 0.4 (0.1-1.3)         |              |
| <b>Charlson</b>      | 0           | <b>1</b>              | <b>0.0001</b>    | <b>1</b>             | <b>0.0004</b>    | <b>1</b>              | <b>0.004</b> | <b>1</b>              | <b>0.01</b>  |
|                      | 1           | <b>1.8 (1.1-2.8)</b>  |                  | <b>2.0 (1.3-3.2)</b> |                  | <b>3.8 (1.0-14.1)</b> |              | <b>3.1 (0.8-11.3)</b> |              |
|                      | 2 or more   | <b>2.6 (1.7-4.0)</b>  |                  | <b>2.5 (1.6-4.0)</b> |                  | <b>7.7 (2.3-26.3)</b> |              | <b>5.2 (1.7-15.9)</b> |              |
| <b>Hospital</b>      | cont        | 1.1 (1.0-1.2)         | 0.1              | 1.0 (1.0-1.1)        | 0.3              | 1.0 (0.8-1.2)         | 0.7          | 1.0 (0.8-1.2)         | 0.7          |
| <b>Stage</b>         | I           | <b>1</b>              | <b>0.006</b>     | <b>1</b>             | <b>0.0002</b>    | 1                     | 0.3          | 1                     | 0.2          |
|                      | II          | <b>1.6 (0.8-3.2)</b>  |                  | <b>1.3 (0.6-2.6)</b> |                  | 4.4 (0.4-48.8)        |              | 5.7 (0.9-36.2)        |              |
|                      | III         | <b>2.5 (1.3-5.1)</b>  |                  | <b>2.6 (1.3-5.3)</b> |                  | 5.8 (0.5-62.4)        |              | 3.9 (0.7-24.1)        |              |
| <b>Emergency</b>     | No          | <b>1</b>              | <b>&lt;0.001</b> | <b>1</b>             | <b>&lt;0.001</b> | -                     |              | -                     |              |
|                      | Yes         | <b>5.0 (3.3-10.0)</b> |                  | <b>3.3 (2.5-5.0)</b> |                  | -                     |              | -                     |              |
| <b>Resection</b>     | Right sided | <b>1</b>              | <b>0.01</b>      | <b>1</b>             | <b>0.03</b>      | -                     |              | -                     |              |
|                      | Left sided  | <b>1.4 (0.9-2.2)</b>  |                  | <b>0.7 (0.4-1.2)</b> |                  | -                     |              | -                     |              |
|                      | Sigmoid     | <b>0.6 (0.4-1.0)</b>  |                  | <b>0.5 (0.3-0.9)</b> |                  | -                     |              | -                     |              |
| <b>Complications</b> | No          | <b>1</b>              | <b>&lt;0.001</b> | <b>1</b>             | <b>&lt;0.001</b> | <b>1</b>              | <b>0.001</b> | <b>1</b>              | <b>0.02</b>  |
|                      | Yes         | <b>3.1 (2.1-4.4)</b>  |                  | <b>2.1 (1.4-3.3)</b> |                  | <b>4.2 (1.8-9.9)</b>  |              | <b>5.9 (1.3-26.8)</b> |              |
| <b>Hospital stay</b> | Short       | <b>1</b>              | <b>&lt;0.001</b> | <b>1</b>             | <b>0.003</b>     | <b>1</b>              | <b>0.002</b> | <b>1</b>              | <b>0.002</b> |
|                      | Long        | <b>4.0 (2.7-5.9)</b>  |                  | <b>2.1 (1.4-3.2)</b> |                  | <b>2.5 (1.0-6.3)</b>  |              | <b>0.4 (0.1-2.1)</b>  |              |
|                      | Unknown     | <b>0.8 (0.1-6.6)</b>  |                  | <b>0.7 (0.1-6.5)</b> |                  | <b>9.9 (2.7-35.9)</b> |              | <b>8.6 (2.4-31.7)</b> |              |
